# Supplementary material
Source: Springer Nature journal article supplement (https://www.springermedizin.de/resource/supplementary/12986_2013_553_MOESM2_ESM.pdf/25655010)

**A****PGC1 $\alpha$** 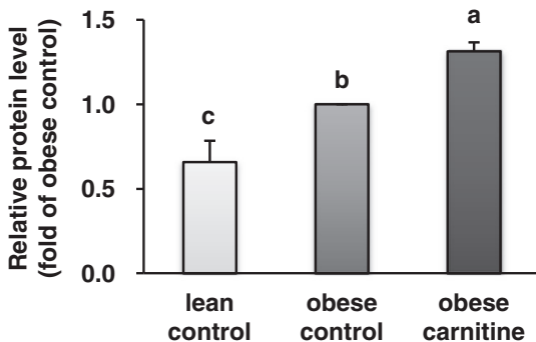**B****PPAR $\delta$** 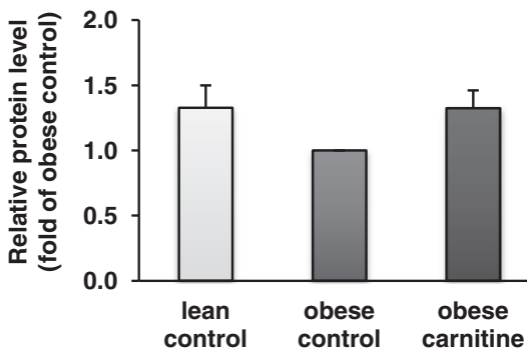**C**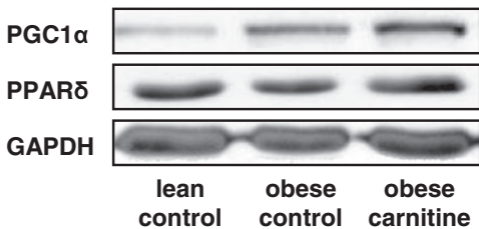

Supplement: MOESM2 [file 25655010]
